# Supplementary material
Source: Springer Nature journal article supplement (https://www.springermedizin.de/resource/supplementary/13023_2010_277_MOESM5_ESM.pdf/9642006)
Supplement: MOESM5 [file 9642006]

| Year | Age | Diagnosis                                      | Comorbidities & Events                                                                           | Treatment                              |                         |             |                   |                         |             |              | Asthma Attack Related       |                    |                |
|------|-----|------------------------------------------------|--------------------------------------------------------------------------------------------------|----------------------------------------|-------------------------|-------------|-------------------|-------------------------|-------------|--------------|-----------------------------|--------------------|----------------|
|      |     |                                                |                                                                                                  | Long + Short-acting $\beta$ 2 Agonists | Inhaled Corticosteroids | Montelukast | Oral theophylline | Oral prednisone (daily) | L-thyroxine | AAT infusion | Emergency Service Attention | Hospital Admission |                |
| 1989 | 27  | Moderate persistent asthma                     |                                                                                                  | +                                      | + <sup>a</sup>          |             |                   |                         |             |              |                             | —                  | —              |
| 1993 | 31  | Nasal polyps<br>Aspirin-sensitive asthma (ASA) | Accelerated FEV1 declination                                                                     | +                                      | + <sup>b</sup>          | +           | +                 |                         |             |              |                             | 1                  | —              |
| 1999 | 37  |                                                | Hyperthyroidism (radioisotope therapy)<br>Resection of nasal polyps                              | +                                      | + <sup>b</sup>          | +           | +                 | +                       |             |              |                             | 3                  | 1              |
| 2000 | 38  |                                                | Yatrogenic hypothyroidism                                                                        | +                                      | + <sup>b</sup>          | +           | +                 |                         | +           |              |                             | 5                  | 2              |
| 2001 | 39  |                                                | Steroid-induced Cushing's syndrome with osteoporosis development                                 | +                                      | + <sup>b</sup>          | +           | +                 | +                       | +           |              |                             | 6                  | —              |
| 2002 | 40  | <b>MZ-AAT deficiency</b>                       |                                                                                                  | +                                      | + <sup>b</sup>          | +           | +                 | +                       | +           |              |                             | 8                  | 2              |
| 2003 | 41  |                                                |                                                                                                  | +                                      | + <sup>b</sup>          | +           | +                 | +                       | +           | +            |                             | 8                  | 2              |
| 2004 | 42  |                                                | Daily oral prednisone removed<br>Steroid-induced osteoporosis and Cushing's syndrome improvement | +                                      | + <sup>b</sup>          | +           | +                 |                         | +           | +            |                             | 3                  | —              |
| 2005 | 43  |                                                | <b>Progressive improvement of quality of life<br/>Lung function declination stopped</b>          | +                                      | + <sup>b</sup>          | +           |                   |                         | +           | +            |                             | 2                  | —              |
| 2006 | 44  |                                                | <b>Decreased emergency service attentions and hospital admissions</b>                            | +                                      | + <sup>b</sup>          | +           |                   |                         | +           | +            |                             | 1                  | —              |
| 2007 | 45  |                                                |                                                                                                  | +                                      | + <sup>b</sup>          | +           |                   |                         | +           | +            |                             | 2                  | 1 <sup>c</sup> |

<sup>a</sup> Medium dose

<sup>b</sup> High dose

<sup>c</sup> Pneumonia
